# Supplementary material for: Overexpression of EcbHLH57 Transcription Factor from Eleusine coracana L. in Tobacco Confers Tolerance to Salt, Oxidative and Drought Stress
Source: PubMed Central journal article supplement (PMC4569372; doi:10.1371/journal.pone.0137098), 2015-09-14
Supplement: pone.0137098.s001.pdf [file pone.0137098.s001.pdf]

GAATCCCCAATTCCCGACGCGGCAGCGGAACCCTAGCACACCCTCCTTCTACCACCTG  
CGCGCGGGCTCCGGCGAGCTCCCCCTCCCGCCGCCGCCACCATGACCTCCTCGGAGGGCT  
CCCAGTGGGTCTTCGATTGCCCCCTGATAGATGACCTCTCGGCCGCCGACTTCGCCGCC  
ACACCCGCGGGGGGCTTCTACTGGACCCCGACGCCGATGCAAGCGCAGCCGCAGCCTCA  
GGTGATCCAACCGCCGTCGCAGCCCGTCGCCGCCGCGGCCTTCCAATCCATGCAGTG  
TGAAATCAATAGCTCTGTGGACTGTAATCAGGGAAAAGAACAGCCAGTGAACAAACGT  
CCAAGGTCAGAAAGCAGTGCTCAACCAAGCACAAAAGCATGTCGAGAAAAAATTAGAAG  
GGACAAGCTAAATGAGAGATTCTTGGAATTGGGTGCCATTTTGGAGCCAGGCAAGACAC  
CTAAAATGGACAAGTCAGCTATACTGAATGATGCGATTCGTGTAGTATCTGAATTGCGT  
ACTGAAGCACAAAAGTTGAAAGATTCAAATGAGAGTTTACAAGAGAAGATCAAAGAGTT  
GAAGGCTGAGAAGAATGAGCTGAGGGAGGAGAAGCAAAGGCTGAAGGCAGAAAAGGAGA  
ACTTGGAGCAGCAAATAAAGTTCATGAATGCACGCCCAAGCCTTGTACCACATCCTCCT  
GTTATCCCAGCATCTGCATTCACCGCACCTCAAGGACCCGCAGCAGGGCAGAAGCTAAT  
GATGCCTGTGATCGGCTACCCTGGATTTCCGATGTGGCAATTCATGCCGCCTTCAGATG  
TGGATACCTCTGATGACCCCAAGTCATGCCCTCCTGTTGCATAAGCAAGCGCAAGCCAG  
TTGCCTGATCTTTTGGAAAGAGGCGATACTGCCCTCCATTCAAGTCTAGTCTGGTTCTC  
AGTGTTGTTGATGTAGTTGACTCGAGAACTTAAGGGAAGCTAAATGTATCAGCTGGTTA  
CATGGGTGATCTGACGACACCGTTGTATATTATTAGTAAATAAAATC

**S1 Figure: Full-length nucleotide sequence of *EcbHLH57*.** The length of nucleotide sequence is 1050bp, sequence in brown- 5'UTR (1-99bp); black- coding region(771bp, 100-870bp); green- 3'UTR (871-1050bp); blue- polyA signal.
