# Supplementary material for: Overexpression of EcbHLH57 Transcription Factor from Eleusine coracana L. in Tobacco Confers Tolerance to Salt, Oxidative and Drought Stress
Source: PubMed Central journal article supplement (PMC4569372; doi:10.1371/journal.pone.0137098), 2015-09-14
Supplement: pone.0137098.s004.pdf [file pone.0137098.s004.pdf]

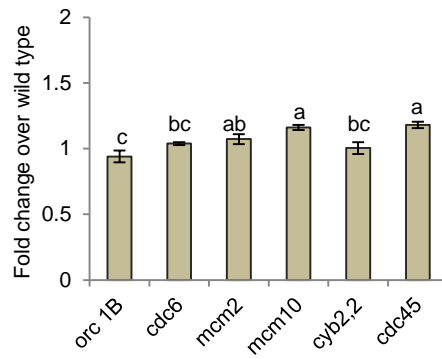

**S4 Figure: Expression analysis of cell-cycle regulating genes in *EcbHLH57* expressing transgenic plants under normal growth conditions.** Graph depicting qRT-PCR analysis of cell-cycle regulating genes. Data represent mean of three replications (n = 3) and bars indicate standard error. The lowercase letters that are different indicate significant difference (Duncan's multiple range test,  $P < 0.05$ ) between means of analyzed genes.
