# Supplementary material for: Overexpression of EcbHLH57 Transcription Factor from Eleusine coracana L. in Tobacco Confers Tolerance to Salt, Oxidative and Drought Stress
Source: PubMed Central journal article supplement (PMC4569372; doi:10.1371/journal.pone.0137098), 2015-09-14
Supplement: pone.0137098.s006.pdf [file pone.0137098.s006.pdf]

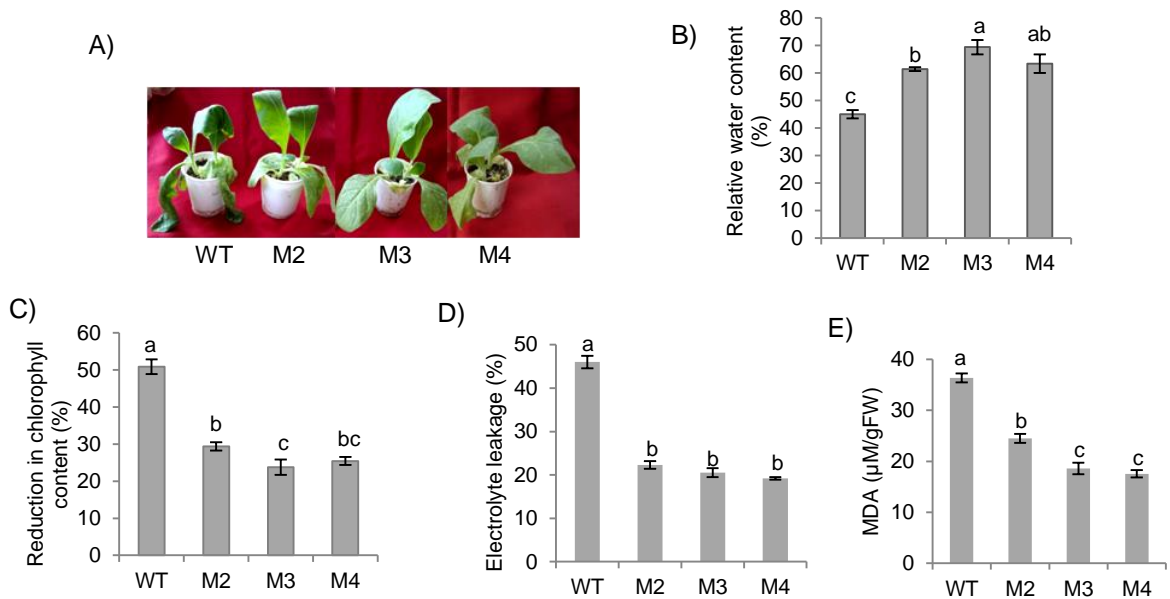

**S6 Figure: Response of *EcbHLH57* expressing tobacco transgenic to drought stress.** 30-day-old plants were subjected to drought stress by withholding water for 1 week. A) Phenotype of plants under drought stress. B) Percent reduction in chlorophyll content C) Relative water content (%) D) Electrolyte leakage and E) MDA content in drought stressed plants. Data represent mean of three replications (n = 3) and bars indicate standard error. The lowercase letters that are different indicate significant difference (Duncan's multiple range test,  $P < 0.05$ ) between transgenic and wild type plants exposed to same treatment.
