# Supplementary material for: Overexpression of EcbHLH57 Transcription Factor from Eleusine coracana L. in Tobacco Confers Tolerance to Salt, Oxidative and Drought Stress
Source: PubMed Central journal article supplement (PMC4569372; doi:10.1371/journal.pone.0137098), 2015-09-14
Supplement: pone.0137098.s007.pdf [file pone.0137098.s007.pdf]

S1 Table: List of primers used in the study

| Sl.No. | Primer name | Sequence (5'-3')                     |
|--------|-------------|--------------------------------------|
| 1.     | EcbHLHFP1   | <i>gaatccccaattcccgacgcggcag</i>     |
| 2.     | EcbHLHRP1   | <i>gcatgctttgcttggtgagcaccgc</i>     |
| 3.     | EcbHLHFP2   | <i>gcatgccgagagaagattagaag</i>       |
| 4.     | EcbHLHRP2   | <i>gattttattactaataatatacaacggtg</i> |
| 5.     | EcbHLHCDS F | <i>atgacctcctcggagggtcccagtgg</i>    |
| 6.     | EcbHLHCDS R | <i>cctcttccaaaagatcaggcaactggc</i>   |
| 7.     | EcbHLHRT F  | <i>agagttgaaggctgaaaagaatgag</i>     |
| 8.     | EcbHLHRT R  | <i>ccacatcggaatccagggtag</i>         |
| 11.    | NTRD29AF    | <i>tcggtgtaccaacaggcata</i>          |
| 12.    | NTRD29AR    | <i>cccttgcttggtgtgttt</i>            |
| 13.    | NtLTP4F     | <i>atgctgcagtgggattaagg</i>          |
| 14.    | NtLTP4R     | <i>agcagtcaatggaagggcta</i>          |
| 15.    | NtLEA14F    | <i>ctccgttcccgtacctatca</i>          |
| 16.    | NtLEA14R    | <i>caatctgcgccaatatcctt</i>          |
| 17.    | NtP5CS F    | <i>tggcactctctttcatcgtg</i>          |
| 18.    | NtP5CS R    | <i>agcttcatttcagccagga</i>           |
| 19.    | Ntrd29B F   | <i>tcggtgtaccaacaggcata</i>          |
| 20.    | Ntrd29B R   | <i>cccttgcttggtgtgttt</i>            |
| 21.    | NtPP2CF     | <i>agccgatgcatacagccatacaga</i>      |
| 22.    | NtPP2CR     | <i>caaacgcacgggaaacagcaagta</i>      |
| 23.    | NtERD1F     | <i>gcatgcatgaagtgatcttgga</i>        |
| 24.    | NtERD1R     | <i>acaaatggctgcaacagcctcatc</i>      |
