# Supplementary material for: Overexpression of EcbHLH57 Transcription Factor from Eleusine coracana L. in Tobacco Confers Tolerance to Salt, Oxidative and Drought Stress
Source: PubMed Central journal article supplement (PMC4569372; doi:10.1371/journal.pone.0137098), 2015-09-14
Supplement: pone.0137098.s008.pdf [file pone.0137098.s008.pdf]

S2 Table: Segregation analysis of the transgenic tobacco expressing *EcBHLH57* transgenic plants.

---

| Lines | Total number of seeds | Kanamycin positive/green seedlings | Kanamycin negative/yellowing seedlings | Segregation ratio Kan <sup>r</sup> /Kan <sup>s</sup> | Chi-square analysis |
|-------|-----------------------|------------------------------------|----------------------------------------|------------------------------------------------------|---------------------|
| M2    | 69                    | 51                                 | 18                                     | 2.97:1                                               | 0.011               |
| M3    | 93                    | 73                                 | 20                                     | 3.13:1                                               | 0.563               |
| M4    | 97                    | 78                                 | 19                                     | 3.22:1                                               | 1.681               |

---
