# Supplementary material for: Overexpression of EcbHLH57 Transcription Factor from Eleusine coracana L. in Tobacco Confers Tolerance to Salt, Oxidative and Drought Stress
Source: PubMed Central journal article supplement (PMC4569372; doi:10.1371/journal.pone.0137098), 2015-09-14
Supplement: pone.0137098.s009.pdf [file pone.0137098.s009.pdf]

S3 Table: Table showing the amplicon length, PCR efficiency and R<sup>2</sup> value for the genes analyzed by qRT-PCR

| Sl.No. | Gene name       | Amplicon length (bp) | Reaction efficiency | R <sup>2</sup> value |
|--------|-----------------|----------------------|---------------------|----------------------|
| 1.     | <i>EcbHLH57</i> | 220                  | 1.973               | 1.00                 |
| 2.     | <i>FmActin</i>  | 214                  | 1.994               | 1.00                 |
| 3.     | <i>NTRD29A</i>  | 203                  | 1.928               | 1.00                 |
| 4.     | <i>NtLTP4</i>   | 185                  | 1.896               | 0.99                 |
| 5.     | <i>NtLEA14</i>  | 183                  | 1.945               | 1.00                 |
| 6.     | <i>NtP5CS</i>   | 196                  | 1.968               | 1.00                 |
| 7.     | <i>Ntrd29B</i>  | 201                  | 1.974               | 1.00                 |
| 8.     | <i>NtPP2C</i>   | 193                  | 1.965               | 1.00                 |
| 9.     | <i>NtERD1</i>   | 204                  | 1.922               | 0.99                 |
| 10.    | <i>NtSOD</i>    | 209                  | 1.986               | 1.00                 |
| 11.    | <i>NtAPX</i>    | 233                  | 1.949               | 0.99                 |
| 12.    | <i>NtADH1</i>   | 218                  | 1.916               | 1.00                 |
| 13.    | <i>NtDREB2A</i> | 208                  | 1.957               | 1.00                 |
| 14.    | <i>NtNAC102</i> | 197                  | 1.991               | 1.00                 |
| 15.    | <i>NtELF</i>    | 188                  | 1.964               | 1.00                 |
| 16.    | <i>NtORC1B</i>  | 202                  | 1.942               | 1.00                 |
| 17.    | <i>NtCDC6</i>   | 186                  | 1.899               | 1.00                 |
| 18.    | <i>NtMCM2</i>   | 193                  | 1.992               | 1.00                 |
| 19.    | <i>NtMCM10</i>  | 216                  | 1.938               | 0.99                 |
| 20.    | <i>NtCYB2,2</i> | 207                  | 1.957               | 0.99                 |
| 21.    | <i>NtCDC45</i>  | 189                  | 1.982               | 1.00                 |
