# Supplementary material for: Overexpression of EcbHLH57 Transcription Factor from Eleusine coracana L. in Tobacco Confers Tolerance to Salt, Oxidative and Drought Stress
Source: PubMed Central journal article supplement (PMC4569372; doi:10.1371/journal.pone.0137098), 2015-09-14
Supplement: pone.0137098.s010.pdf [file pone.0137098.s010.pdf]

S4 Table: Comparison of yield parameters of the *EcbHLH57* expressing transgenic and wild type plants under long-term salinity stress. Data represent mean of three replications (n = 3) and bars indicate standard error. The lowercase letters that are different indicate significant difference (Duncan's multiple range test, P<0.05) between transgenic and wild type plants exposed to same treatment.

| Lines | Plant height (cm)      | TDM (g)               | Seed weight/pod (mg)   | Number of pods/plant (number) |
|-------|------------------------|-----------------------|------------------------|-------------------------------|
| WT    | 64.5±2.1 <sup>c</sup>  | 29.9±0.6 <sup>c</sup> | 87.0±4.0 <sup>c</sup>  | 16.0±1.0 <sup>c</sup>         |
| M2    | 85.9±1.6 <sup>b</sup>  | 44.0±1.3 <sup>b</sup> | 117.0±3.0 <sup>b</sup> | 34.5±2.5 <sup>b</sup>         |
| M3    | 100.3±2.6 <sup>a</sup> | 52.0±1.1 <sup>a</sup> | 126.5±2.5 <sup>a</sup> | 41.0±3.0 <sup>a</sup>         |
| M4    | 91.0±2.8 <sup>ab</sup> | 50.5±1.0 <sup>a</sup> | 123.0±2.0 <sup>a</sup> | 38.5±3.5 <sup>ab</sup>        |
